# Supplementary material for: Single-walled carbon nanotube induced re-entrant hexagonal phases in a Pluronic block copolymer system
Source: Royal Society of Chemistry journal article supplement (doi:10.1039/c3sm27589b), 2013-01-01
Supplement: c3sm27589b.pdf [file c3sm27589b.pdf]

## Supporting Information

# Single-Walled Carbon Nanotube Induced Re-entrant Hexagonal Phases in a Pluronic Block Copolymer System

*Hyung-Sik Jang<sup>a</sup>, Tae-Hwan Kim<sup>a, b</sup>, Changwoo Do<sup>a</sup>, Min-Jae Lee<sup>a</sup>, and Sung-Min Choi<sup>a\*</sup>*

<sup>a</sup>Department of Nuclear and Quantum Engineering, Korea Advanced Institute of Science and  
Technology, 291 Daehak-ro, Yuseong-gu, Daejeon, 305-701, Republic of Korea

<sup>b</sup>Neutron Science Division, Department of Reactor Utilization and Development, Korea Atomic Energy  
Research Institute, 1045 Daedeok-daero, Yuseong-gu, Daejeon, 305-353, Republic of Korea

\*To whom correspondence should be addressed; E-mail: [sungmin@kaist.ac.kr](mailto:sungmin@kaist.ac.kr).

**Table S1.** Scattering peak positions at each concentration of F127 in H<sub>2</sub>O. The unit of peak position is nm<sup>-1</sup>. The peak position ratios are given in parenthesis.

| Concentration<br>(main phase) | 1 <sup>st</sup> peak | 2 <sup>nd</sup> peak | 3 <sup>rd</sup> peak       | 4 <sup>th</sup> peak        | 5 <sup>th</sup> peak        | 6 <sup>th</sup> peak | 7 <sup>th</sup> peak | 8 <sup>th</sup> peak |
|-------------------------------|----------------------|----------------------|----------------------------|-----------------------------|-----------------------------|----------------------|----------------------|----------------------|
| 20%<br>(FCC)                  | 0.357<br>(√3)        | 0.586<br>(√8)        | 0.684<br>(√11)             | 0.712 <sup>a</sup><br>(√12) | 0.822 <sup>a</sup><br>(√16) | 0.906<br>(√19)       |                      |                      |
| 25%<br>(FCC)                  | 0.390<br>(√3)        | 0.435<br>(-)         | 0.629<br>(√8)              | 0.728<br>(√11)              | 0.974<br>(√19)              |                      |                      |                      |
| 30%<br>(BCC<br>+FCC)          | 0.411<br>(1)<br>(√3) | 0.577<br>(√2)        | 0.649<br>(√8)              | 0.722<br>(√3)               | 0.811<br>(√4)               |                      |                      |                      |
| 35%<br>(BCC<br>+FCC)          | 0.364<br>(-)         | 0.418<br>(1)<br>(√3) | 0.600<br>(√2)              | 0.664<br>(√8)               | 0.733<br>(√3)               | 0.823<br>(√4)        |                      |                      |
| 40%<br>(BCC)                  | 0.426<br>(1)         | 0.607<br>(√2)        | 0.738<br>(√3)              | 0.848<br>(√4)               | 0.951<br>(√5)               | 1.139<br>(√7)        |                      |                      |
| 45%<br>(BCC)                  | 0.439<br>(1)         | 0.622<br>(√2)        | 0.760<br>(√3)              | 0.872<br>(√4)               | 1.081<br>(√6)               | 1.165<br>(√7)        | 1.307<br>(√9)        |                      |
| 50%<br>(BCC)                  | 0.440<br>(1)         | 0.623<br>(√2)        | 0.760<br>(√3)              | 0.995<br>(√5)               | 1.078<br>(√6)               | 1.164<br>(√7)        | 1.312<br>(√9)        |                      |
| 55%<br>(BCC)                  | 0.428<br>(1)         | 0.611<br>(√2)        | 0.740<br>(√3)              | 0.976<br>(√5)               | 1.064<br>(√6)               | 1.139<br>(√7)        | 1.268<br>(√9)        |                      |
| 60%<br>(BCC)                  | 0.423<br>(1)         | 0.599<br>(√2)        | 0.685 <sup>a</sup><br>(-)  | 0.725<br>(√3)               | 0.850<br>(√4)               | 0.954<br>(√5)        | 1.042<br>(√6)        | 1.120<br>(√7)        |
| 65%<br>(hexagonal)            | 0.401<br>(1)         | 0.681<br>(√3)        | 0.789 <sup>a</sup><br>(√4) | 1.074<br>(√7)               |                             |                      |                      |                      |
| 70%<br>(hexagonal)            | 0.404<br>(1)         | 0.684<br>(√3)        | 1.072<br>(√7)              |                             |                             |                      |                      |                      |
| 75%<br>(hexagonal)            | 0.423<br>(1)         | 0.727<br>(√3)        | 0.846<br>(√4)              | 1.114<br>(√7)               | 1.263<br>(√9)               | 1.458<br>(√12)       |                      |                      |
| 80%<br>(hexagonal)            | 0.423<br>(1)         | 0.732<br>(√3)        | 0.844<br>(√4)              | 1.121<br>(√7)               | 1.261<br>(√9)               |                      |                      |                      |
| 85%<br>(Lam<br>+Hex)          | 0.328<br>(1)         | 0.425<br>(1)         | 0.656<br>(2)               | 0.732<br>(√3)               | 0.841<br>(√4)               | 1.122<br>(√7)        | 1.263<br>(√9)        |                      |
| 90%<br>(Lamellar)             | 0.342<br>(1)         | 0.428<br>(-)         | 0.686<br>(2)               |                             |                             |                      |                      |                      |
| 100%<br>(Lamellar)            | 0.350<br>(1)         | 0.701<br>(2)         |                            |                             |                             |                      |                      |                      |

\* (-) comes from the transition peak which is under appearing or disappearing.

\* a : recognizable peaks which can not be detected by fitting.

**Table S2.** Scattering peak positions at each concentration of F127-SWNT in H<sub>2</sub>O. The unit of peak position is nm<sup>-1</sup>. The peak position ratios are given in parenthesis.

| Concentration<br>(main phase) | 1 <sup>st</sup> peak | 2 <sup>nd</sup> peak           | 3 <sup>rd</sup> peak    | 4 <sup>th</sup> peak                      | 5 <sup>th</sup> peak                       | 6 <sup>th</sup> peak                 | 7 <sup>th</sup> peak    |
|-------------------------------|----------------------|--------------------------------|-------------------------|-------------------------------------------|--------------------------------------------|--------------------------------------|-------------------------|
| 20%<br>(hexagonal)            | 0.323<br>(1)         | 0.567<br>( $\sqrt{3}$ )        | 0.655<br>( $\sqrt{4}$ ) | 0.864<br>( $\sqrt{7}$ )                   | 0.963 <sup>a</sup><br>( $\sqrt{9}$ )       |                                      |                         |
| 25%<br>(hexagonal)            | 0.335<br>(1)         | 0.585<br>( $\sqrt{3}$ )        | 0.683<br>( $\sqrt{4}$ ) | 0.900<br>( $\sqrt{7}$ )                   | 1.028<br>( $\sqrt{9}$ )                    |                                      |                         |
| 30%<br>(FCC<br>+hex)          | 0.355<br>(1)         | 0.378<br>( $\sqrt{3}$ )        | 0.429<br>( $\sqrt{4}$ ) | 0.615<br>( $\sqrt{8}$ )<br>( $\sqrt{3}$ ) | 0.716<br>( $\sqrt{11}$ )<br>( $\sqrt{4}$ ) | 0.934<br>( $\sqrt{7}$ )              |                         |
| 35%<br>(FCC<br>+hex)          | 0.357<br>(1)         | 0.389<br>( $\sqrt{3}$ )        | 0.431<br>( $\sqrt{4}$ ) | 0.627<br>( $\sqrt{8}$ )<br>( $\sqrt{3}$ ) | 0.730<br>( $\sqrt{11}$ )<br>( $\sqrt{4}$ ) | 0.937<br>( $\sqrt{7}$ )              |                         |
| 40%<br>(BCC<br>+FCC)          | 0.396<br>(-)         | 0.413<br>(1)<br>( $\sqrt{3}$ ) | 0.602<br>( $\sqrt{2}$ ) | 0.666<br>( $\sqrt{8}$ )                   | 0.741<br>( $\sqrt{3}$ )                    | 0.966<br>( $\sqrt{5}$ )              |                         |
| 45%<br>(BCC)                  | 0.427<br>(1)         | 0.621<br>( $\sqrt{2}$ )        | 0.683<br>(-)            | 0.750<br>( $\sqrt{3}$ )                   | 0.972<br>( $\sqrt{5}$ )                    |                                      |                         |
| 50%<br>(BCC)                  | 0.386<br>(-)         | 0.432<br>(1)                   | 0.624<br>( $\sqrt{2}$ ) | 0.728<br>( $\sqrt{3}$ )                   | 0.969<br>( $\sqrt{5}$ )                    | 1.079<br>( $\sqrt{6}$ )              | 1.162<br>( $\sqrt{7}$ ) |
| 55%<br>(BCC)                  | 0.388<br>(-)         | 0.425<br>(1)                   | 0.623<br>( $\sqrt{2}$ ) | 0.714<br>( $\sqrt{3}$ )                   | 0.967<br>( $\sqrt{5}$ )                    | 1.074<br>( $\sqrt{6}$ )              |                         |
| 60%<br>(BCC)                  | 0.418<br>(1)         | 0.598<br>( $\sqrt{2}$ )        | 0.666<br>(-)            | 0.731<br>( $\sqrt{3}$ )                   | 0.970<br>( $\sqrt{5}$ )                    | 1.036<br>( $\sqrt{6}$ )              | 1.113<br>( $\sqrt{7}$ ) |
| 65%<br>(hexagonal)            | 0.407<br>(1)         | 0.704<br>( $\sqrt{3}$ )        | 0.803<br>( $\sqrt{4}$ ) | 1.002<br>(-)                              | 1.085<br>( $\sqrt{7}$ )                    | 1.207 <sup>a</sup><br>( $\sqrt{9}$ ) |                         |
| 70%<br>(hexagonal)            | 0.410<br>(1)         | 0.712<br>( $\sqrt{3}$ )        | 0.812<br>( $\sqrt{4}$ ) | 1.011<br>(-)                              | 1.092<br>( $\sqrt{7}$ )                    | 1.215 <sup>a</sup><br>( $\sqrt{9}$ ) |                         |
| 75%<br>(Lam<br>+Hex)          | 0.328<br>(1)         | 0.414<br>(1)                   | 0.658<br>(2)            | 0.718<br>( $\sqrt{3}$ )                   | 0.800 <sup>a</sup><br>( $\sqrt{4}$ )       | 1.017<br>(-)                         | 1.104<br>( $\sqrt{7}$ ) |
| 80%<br>(Lam<br>+Hex)          | 0.324<br>(1)         | 0.418<br>(1)                   | 0.639<br>(2)            | 0.722<br>( $\sqrt{3}$ )                   | 0.833<br>( $\sqrt{4}$ )                    | 1.104<br>( $\sqrt{7}$ )              | 1.250<br>( $\sqrt{9}$ ) |
| 85%<br>(Lamellar)             | 0.324<br>(1)         | 0.415<br>(-)                   | 0.643<br>(2)            | 1.019<br>(-)                              | 1.103<br>(-)                               |                                      |                         |
| 90%<br>(Lamellar)             | 0.332<br>(1)         | 0.662<br>(2)                   |                         |                                           |                                            |                                      |                         |
| 100%<br>(Lamellar)            | 0.347<br>(1)         | 0.694<br>(2)                   |                         |                                           |                                            |                                      |                         |

\* (-) comes from the transition peak which is under appearing or disappearing.

\* a : recognizable peaks which can not be detected by fitting.
